# Supplementary material
Source: publisher site journal article supplement (https://www.spandidos-publications.com/2544/downloadSupplementary)

Figure S1. Western blotting analysis of rat vessel protein extracts using anti- $\beta$ -actin (42 kDa). Lane 1, molecular weight marker; lane 2, control group (rat 1); lane 3, control group (rat 2; included in Fig. 5C); lane 4: Sample collected after 120 min post-injury (included in Fig. 5C).

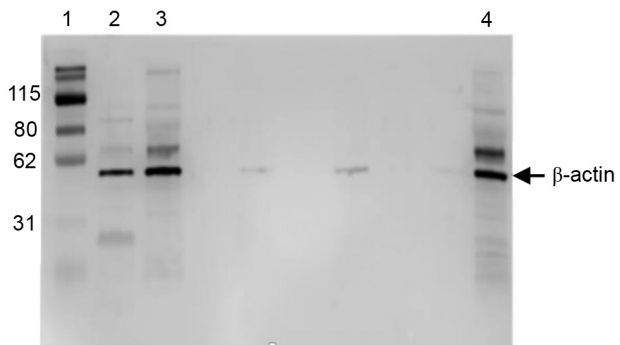

Figure S2. Western blot analysis of rat vessel protein extracts using anti-ERp72 (72 KDa). Lane 1, molecular weight marker; lane 2, control group (rat 1); lane 3, control group (rat 2; included in Fig. 5C); lane 4: Sample collected after 120 min post-injury (included in Fig. 5C). ERp75, endoplasmic reticulum resident protein 72.

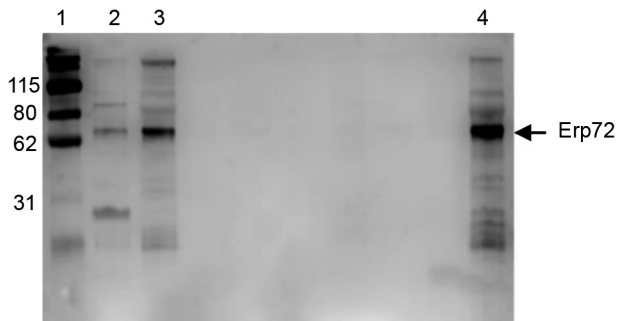

Supplement: Supplementary file 1 [file downloadSupplementary]
